# Supplementary material for: A CLAVATA3-like Gene Acts as a Gynoecium Suppression Function in White Campion
Source: PubMed Central journal article supplement (PMC9550985; doi:10.1093/molbev/msac195), 2022-09-27
Supplement: msac195_supplementary_data.pdf [file msac195_supplementary_data.pdf]

# Supplemental Fig. 1

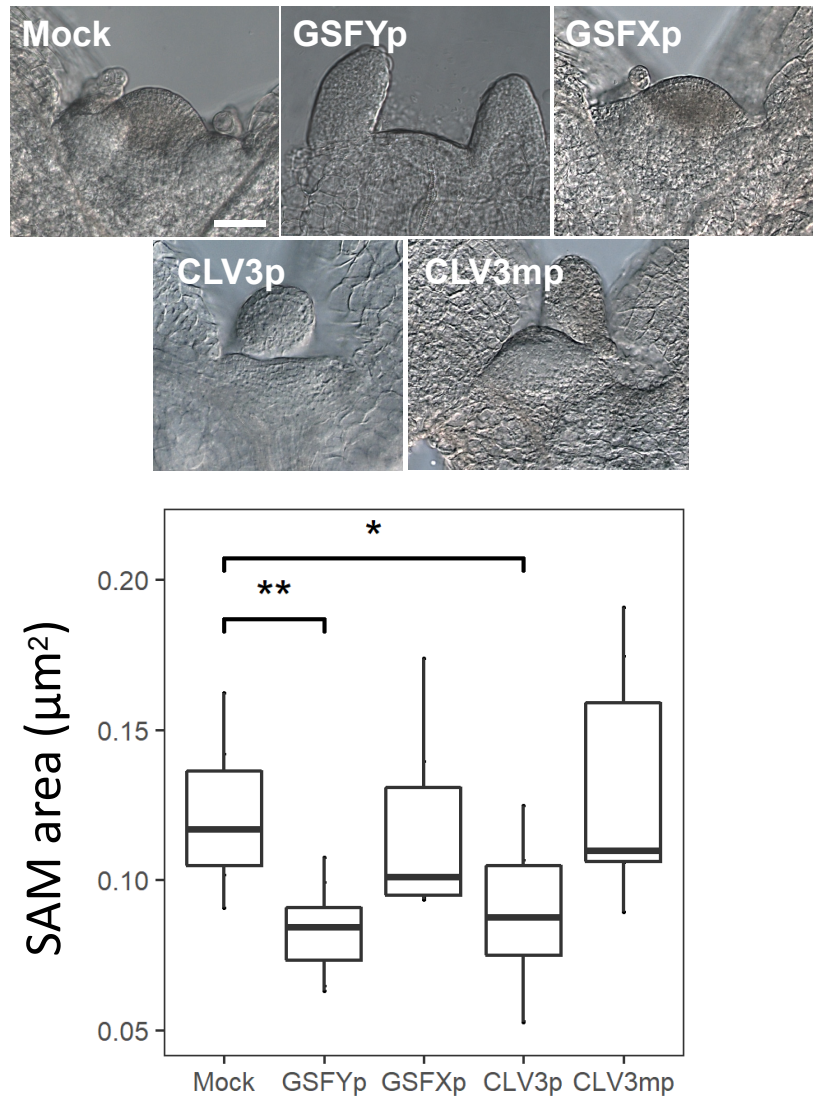

**Fig. S1** The effects of different CLE peptides on *A. thaliana* SAM. CLE peptide treatment on the seedlings of *clv3-101 A. thaliana* mutants which is one of the null mutants of *clv3*. The SAMs were observed under a differential interference contrast (DIC) microscope after 5 d of growth on requid 1/2 MS media with 0.1  $\mu\text{M}$  different peptides followed by calculation of SAM diameter by Image-J (at least four samples for each treatment). Upper panels shows photographs of representative plants. The lower panel shows quantitative measurements of the SAM area. GSFYp and CLV3p showed significant suppression of SAM growth ( $p < 0.01$ , and  $p < 0.05$ , respectively), while GSFpX and CLV3mp showed almost no effect. Bar, 50  $\mu\text{m}$ . Box plots, 25th-75th percentile; centre line, median; whiskers, full data range in B and D.

## Supplemental Fig. 2

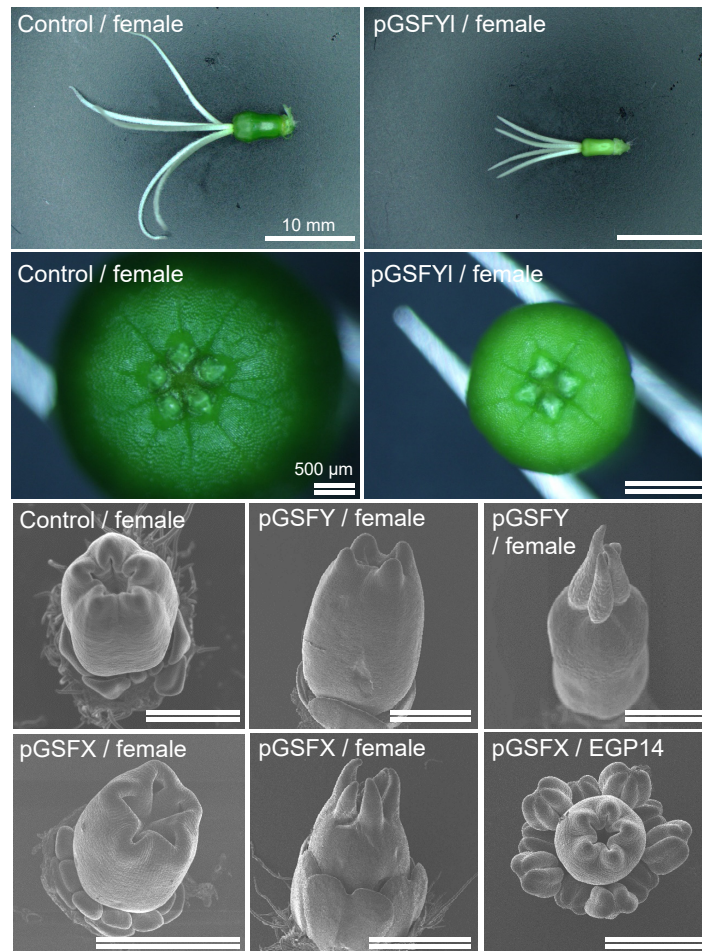

**Fig. S2** The effect of GSFYp treatment on gynoecium development in *S. latifolia* female plants. Flower buds at stage 1-3 were treated with water containing 5  $\mu$ M GSFYp. Open flowers were dissected and observed under stereo microscopy and SEM. GSFYp treatment decreased the size of ovaries and the number of styles, but neither females nor hermaphroditic mutant (EGP14) had decreased size of ovaries in the GSFXp treatment.

**Table S1.** Contigs identified identified by genomic seq and RNA-seq to narrow down candidate genes.

| Contig ID | Sequence                                                                                                                                                                                                                                                                                                                                                                                                                                                                                                                                                                                                                                                                                                                                                                                                                                                                                                                                                                                                                                                                                                                                                                                                                                                                                                                                                                                                                                                                                                                                                                                                                                                                                                                                                                                                                                                                                                                                                                                                                                                                                                         |
|-----------|------------------------------------------------------------------------------------------------------------------------------------------------------------------------------------------------------------------------------------------------------------------------------------------------------------------------------------------------------------------------------------------------------------------------------------------------------------------------------------------------------------------------------------------------------------------------------------------------------------------------------------------------------------------------------------------------------------------------------------------------------------------------------------------------------------------------------------------------------------------------------------------------------------------------------------------------------------------------------------------------------------------------------------------------------------------------------------------------------------------------------------------------------------------------------------------------------------------------------------------------------------------------------------------------------------------------------------------------------------------------------------------------------------------------------------------------------------------------------------------------------------------------------------------------------------------------------------------------------------------------------------------------------------------------------------------------------------------------------------------------------------------------------------------------------------------------------------------------------------------------------------------------------------------------------------------------------------------------------------------------------------------------------------------------------------------------------------------------------------------|
| C282650   | CCTAATCTTGTTTGGTTCAACCCAAGTTATAGAAGGGGGGATTGAGTTTGAATCCAAG<br>GGGAGATGGTAGGTATGAGATTTCAAGGGGTTGAGGTGTAGTTAGAATCCATTTGGTA<br>TCTAACTTCATTCCTAAATTACCCAACCAACACTTGAATGGACTCAATTAATTCCATTC<br>CATTCCAAGTAGCCAACCAAGCACCCCTTTAGTAGATTCCGGCCTAATCAGTAGATTGA<br>CCAAGCAATCTATTATTTTATGATGTGTTTGGTAAACGACGTATTTTGACAATATATTGGC<br>CGAAATCTATTGTTTTTTAATATGCTCCTAATAGTAGCATATTGTATTAGCATATTCAAT<br>TTATACATGAAACCATTTTAATTATCCTATAATCTGCTAATTACCAAACACCCTTTTCTA<br>ATCCTGCTAATTTAATTTGATAGTCAAACCTGCTACTAAAATTTACTAACGTTATCCGC<br>TATCTTGAATCTGTTTATGCTGTTTACCAAACAGGACCATACATATGTTAAGGTAAACA<br>ACATTTTGTAAAACAAGGTAATATGCTGTTTTAATATGTTATTATGTTGTTTACCAAATA<br>CCAAAGTTGACATAAGAGTGGCAAAAAAAGCTTTGAATATGCTAAAAGTCTTCCAAAATG<br>ATTTTTATTACCAAACATCTTCTATGTCATTGTATAATTGTACCAAATGTCTAATTATCTT<br>TTTAGCTTATTTATCCGATAATTTAAGTTGATTAATTAGCTATTTATATGTTTTTGTCTATC<br>TTTTGAATTTAGTTTCTTTGCCGTTTTAGTTAACTTTTTAATTGATCTCACCAAACATA<br>TAAACATTGGGAAATTGATCTCACCAAACCTATAAACATTGGGAAAGAAAACCCCTATAT<br>CTCTACATGAAATCATCTCACAAAAACAATATTATGGAAAAATATCACTATCTCTACAA<br>GTCCACAAGTTGCCATTAACATTAGAGCTAACAATATTATGATCGGTGGCGGAGTCA<br>CATTGTATTTTAAAAGCTAGTTCTGAGATTGAAACACACCCGCAACTAAACAAAAGCACC<br>TAAGGGAATTTCCATCTAGCCCAGAGCATCGCCGTTAAGTGCGTAGAACTCCTGTAAT<br>GCAAAAAAAAAGATAATCTAAATAGTTAGTAGGCACAAGAAAACCAGATAAACTCTTC<br>AAGTTATCTATGTCATACAATTTAGTCACTAAAATGGATTGGGAACTGTCAAATAT<br>TTTCTTCTTTTGGTCGGGGAAGGGACACTGTCGGCATTAAAGAATCAAGTAGCTGGAA<br>TAAATAAATGTAAACCAAACCTGACCTCTGCTTGACATCGCATATCAAAGCATAGAGAA<br>CTCTATGAAAATATAGGGAGAAGCCGTTGTTTAGAAATGCTTCATAGTACATTCTGTTT<br>TTTTCATAATCTAAAGAAGCCGATTCACCCATCCCGATACTTAACATTTTATATAAATAG<br>ACTTCTGCAGCACCTAGTAATTCTACTCCCCAACCTTGAGTAAAGTTTAAAGGGAGTAT<br>TTTGTCAAACATCTGAACCTGCTCAGCCATATGTTTAACTCAACAGATGTATATGTATTT<br>AACCCACACATTTTTTTAGATTACACGATATTATTAATCAATGAAGGAGCAAAAGGC<br>GACAAGGGGTTATAATGTAAAGATGCATAATTCGTTGTATAAACATAATTGAGATACC<br>CTCTAAAAAACACCTGAAGCTCCCAAATGATAATTTACAGTTGGTGCCATTCTGTTAG<br>TTTAAATGCTAGGCATAGCTTTCATCCACCATACATGTTAAGTATAAGACTAAATCAGAA<br>TCTCAAGAACAAGTCAAACAATCTGTACAGAAGTAACAGAAGTCAAGTGAGAGCGTG<br>CTTTATAAACGGGTAA |
| C280774   | CATTGTATTTTAAAAGCTAGTTCTGAGATTGAAACACACCCGCAACTAAACAAAAGCACC<br>TAAGGGAATTTCCATCTAGCCCAGAGCATCGCCGTTAAGTGCGTAGAACTCCTGTAAT<br>GCAAAAAAAAAGATAATCTAAATAGTTAGTAGGCACAAGAAAACCAGATAAACTCTTC<br>AAGTTATCTATGTCATACAATTTAGTCACTAAAATGGATTGGGAACTGTCAAATAT<br>TTTCTTCTTTTGGTCGGGGAAGGGACACTGTCGGCATTAAAGAATCAAGTAGCTGGAA<br>TAAATAAATGTAAACCAAACCTGACCTCTGCTTGACATCGCATATCAAAGCATAGAGAA<br>CTCTATGAAAATATAGGGAGAAGCCGTTGTTTAGAAATGCTTCATAGTACATTCTGTTT<br>TTTTCATAATCTAAAGAAGCCGATTCACCCATCCCGATACTTAACATTTTATATAAATAG<br>ACTTCTGCAGCACCTAGTAATTCTACTCCCCAACCTTGAGTAAAGTTTAAAGGGAGTAT<br>TTTGTCAAACATCTGAACCTGCTCAGCCATATGTTTAACTCAACAGATGTATATGTATTT<br>AACCCACACATTTTTTTAGATTACACGATATTATTAATCAATGAAGGAGCAAAAGGC<br>GACAAGGGGTTATAATGTAAAGATGCATAATTCGTTGTATAAACATAATTGAGATACC<br>CTCTAAAAAACACCTGAAGCTCCCAAATGATAATTTACAGTTGGTGCCATTCTGTTAG<br>TTTAAATGCTAGGCATAGCTTTCATCCACCATACATGTTAAGTATAAGACTAAATCAGAA<br>TCTCAAGAACAAGTCAAACAATCTGTACAGAAGTAACAGAAGTCAAGTGAGAGCGTG<br>CTTTATAAACGGGTAA                                                                                                                                                                                                                                                                                                                                                                                                                                                                                                                                                                                                                                                                                                                                                                                                                                                                                                                                                                                                                                                                                                                        |

**Table S1. Continued**

---

ATCTTGAAAAACCTTAGTGTTCCAAGAAGCGTCACATATATATGTATTGATTCCAGGAT  
TTAAATTGATGAACCGGGGATATATTAATACTTTGTCAAAAATGAAAAAGAAAAGTAA  
CAGCAACCGAAACTTCTTACTTCTGCTTTTACTTAATTCTACAACAGTCAACAGACCGT  
GTTTCAGCTAAACAGCAAAGAACACAGTCATTCGAGATAACCCAAACCGGCTACGAAAA  
TAAACTTAAATTACATGACTTGAAAAACGTAAACAAGCTAGCTAGGTTTTACTTTTTGA  
ACTAACATTCAAAACAGACAGTGTTTTAGCTAAACAGCAAAAAAACACCGTTATTCGAG  
ATGACCAAACCGAAACTGGCTACGATAAACGTAAGTTTACATTTCTTGAAAGGTAAAC  
C279090 AACCAAGCTAGGTTTTACTTTTTGAAGGTAACATTCAGAATCTGAGAAATAATCGTCAAG  
GACTAATTCTGGGCCTCTTTTGTGGGCCATTGTTGTGATGTACTGGATCTGGCCCAGAT  
GGTACATTCCTCGATTCCATATCATATTTGGACTTTGCCAGCTCCACTGCTCCTGATTC  
TTTGTGCCCACTATCCCATCAGAACTGCAGGACATATTACACCTCAGTTAGGTTGTT  
CCCACTATTCAATACTTTGTATTACCTTGCTTATCCGTCTCGAACACTCGATAAGAATAG  
GACACTTATACATTTTATTCTAGACCAAAGCATGAAATATTTATTCTGTATTCCGAATC  
AAAACGGTCAATGAAGTTATTTACTTGCCAATTTTACGAGAGTCTATTATAGTCGATAA  
GTCGAATCA

---

**Table S2.** Summary of sequence data generated for mutants and controls.

| <b>Individual</b>                  | <b>Data in Gb</b> | <b>Accession No.</b> |
|------------------------------------|-------------------|----------------------|
| <b>Genomic data</b>                |                   |                      |
| R025                               | 273               | DRR357638-DRR357639  |
| Female                             | 131               | DRR360300            |
| <b>Transcriptome sequence data</b> |                   |                      |
| Male                               | 4.20              | DRR359968            |
| R025                               | 4.48              | DRR359969            |
| Male                               | 23.3              | DRR360400            |

**Table S3.** Primers used in this study.

| Primer name | Sequence                                       |
|-------------|------------------------------------------------|
| C282650_F1  | ATG GTA GGT ATG AGA TTT CAA GGG G              |
| C282650_R1  | TGA TTA GGC CGG AAT CTA CTA AAG G              |
| C280774_F1  | TGT CGG CAT TAA AGA ATC AAG TAG C              |
| C280774_R1  | CTT TAC ATT ATA ACC CCT TGT CGC C              |
| C279090_F2  | GCA AAG AAC ACA GTC ATT CGA GAT A              |
| C279090_R2  | CTT ACG TTT ATC GTA GCC AGT TTC G              |
| GSFY_F7     | ATG TCT ACT ACT TAT AAT AGT GTT ACT G          |
| GSFX_F3     | CGT CCC TTT TAA GCC AAC TG                     |
| GSFX_R2     | CCG AAA TAA CCG AAA CTG A                      |
| SLactin01   | TTA CCG TAA AGG TCC TTC CTG AT                 |
| SLactin02   | AGC TTC GTG TTG CTC CTG AAG A                  |
| GSFY_cF2    | ATC ATG GCA GAT TGT TAC GTC TCT T              |
| GSFY_cR2    | ATC TTC TAG AAA GAT TCA AGG ACT AAT TCT GGG CC |
| GSFY_gF2b   | GTT TTT CAG CAA GAT CAC GTT TTC GAC AAA ATT GC |
| GSFY_gR2    | ACA ATC TGC CAT GAT CAC AAG CAA AAT CAT CAG T  |
| GSFY_gF1b   | TAT ATG TTT GAA GCT CAC GTT TTC GAC AAA ATT GC |
| GSFY_gcR1b  | GAT CGG GGA AAT TCG TCA AGG ACT AAT TCT GGG CC |
| GSFX_gF1    | TAT ATG TTT GAA GCT GAA TTC GGA AGA TGA CAA TG |
| GSFX_gcR1   | GAT CGG GGA AAT TCG TCA TGG ACT AAT TAT GGG CC |
